# Supplementary figures and images for: Male-Biased microRNA Discovery in the Pea Aphid
Source: MDPI journal article supplement (doi:10.3390/insects12060533), 2021-06-08

Figure S2

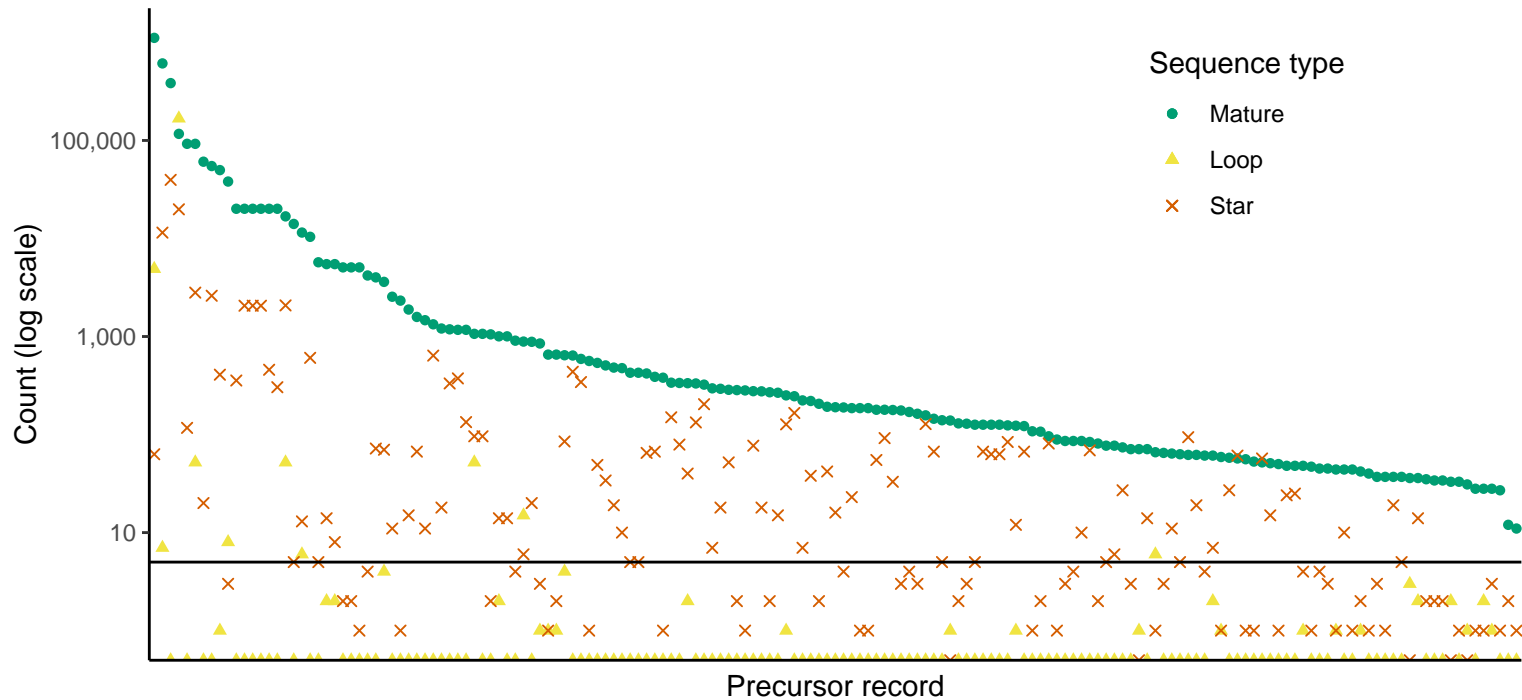

Supplement: s1 [file s1]

Figure S4

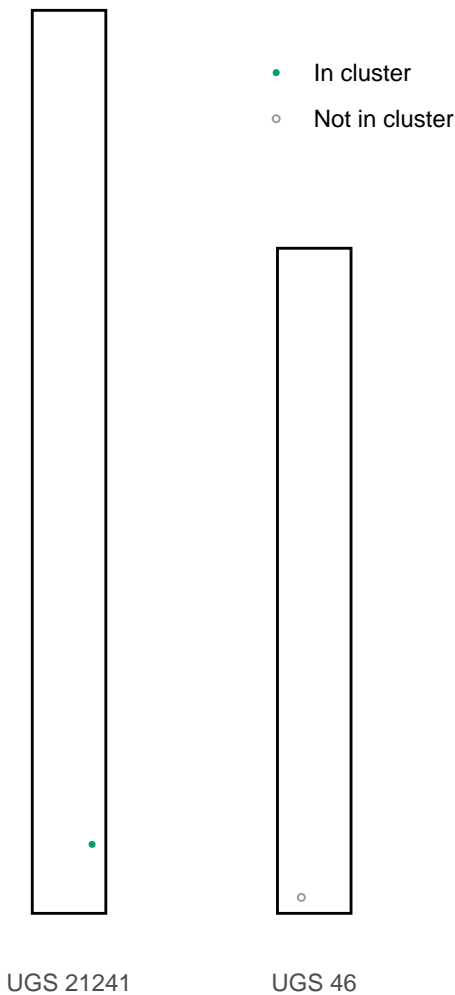

Supplement: s1 [file s1]

Figure S1

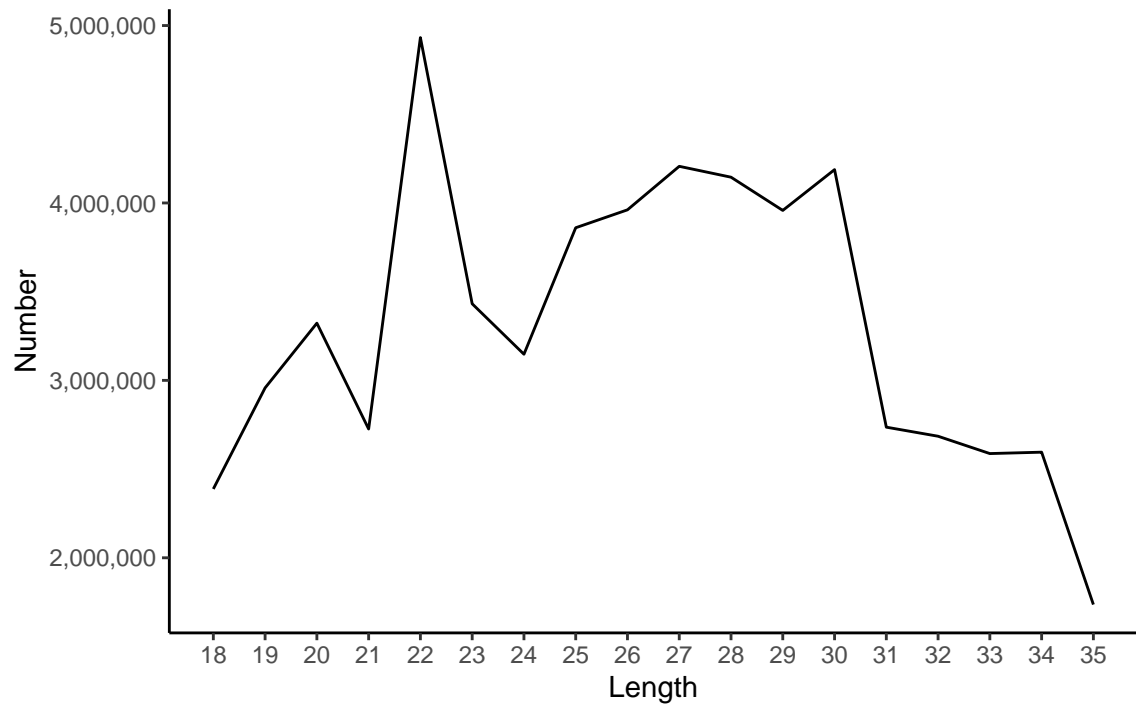

Supplement: s1 [file s1]

Figure S3

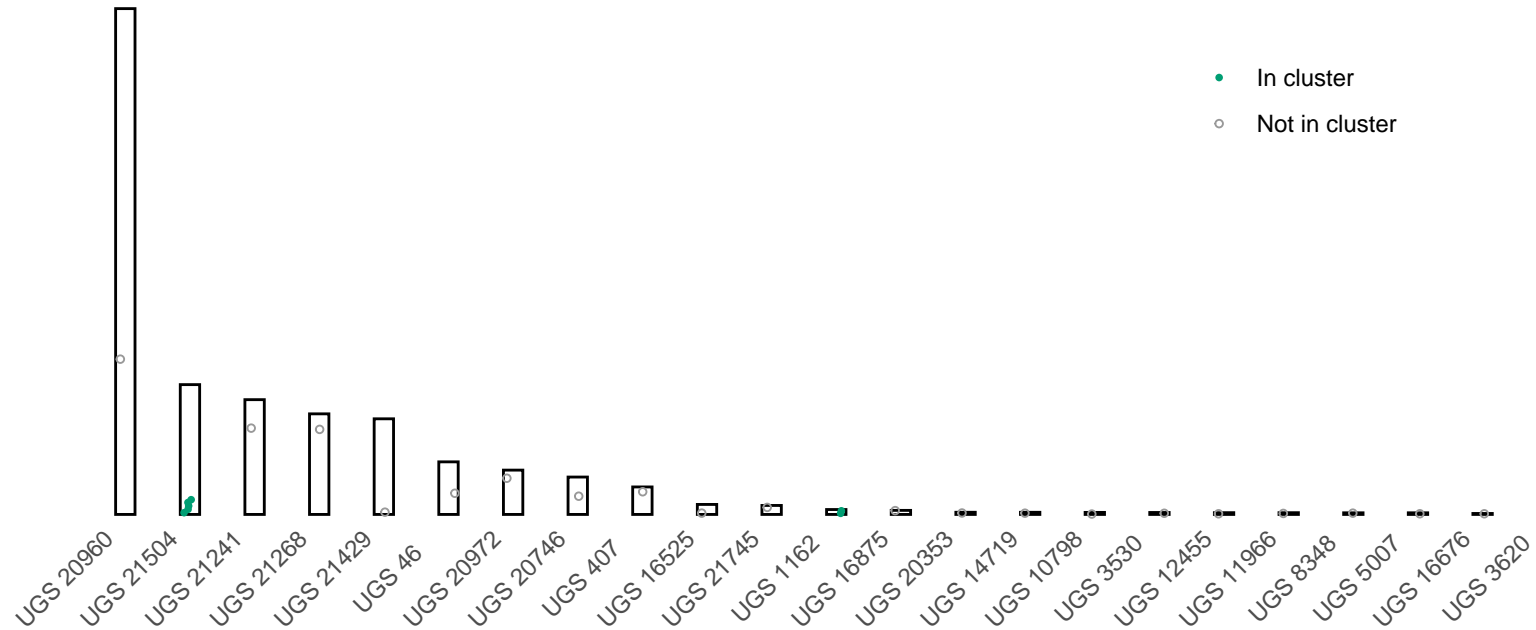

Supplement: s1 [file s1]
